# Supplementary material
Source: MDPI journal article supplement (https://www.mdpi.com/2075-4442/9/7/67)
Supplement: s1 [file s1]

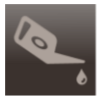

## Supplementary material

## EHL simulation results from the LHS for different geometry pairings \*

| pairing     | T.-No. | Geometrical parameters |          |            | results         |                      |           |
|-------------|--------|------------------------|----------|------------|-----------------|----------------------|-----------|
|             |        | $r_R$ [mm]             | $e$ [mm] | $r_B$ [mm] | $p_{max}$ [MPa] | $h_{min}$ [ $\mu$ m] | $COF$ [-] |
| sphere/cone | 1      | 10                     | 0        | 0          | 1119            | 0.25                 | 0.065     |
|             | 2      | 28                     | 0        | 0          | 761             | 0.46                 | 0.041     |
|             | 3      | 39                     | 0        | 0          | 620             | 0.55                 | 0.028     |
|             | 4      | 62                     | 0        | 0          | 506             | 0.69                 | 0.015     |
|             | 5      | 74                     | 0        | 0          | 472             | 0.74                 | 0.011     |
|             | 6      | 96                     | 0        | 0          | 424             | 0.83                 | 0.007     |
|             | 7      | 120                    | 0        | 0          | 372             | 0.92                 | 0.005     |
|             | 8      | 136                    | 0        | 0          | 339             | 0.96                 | 0.004     |
|             | 9      | 160                    | 0        | 0          | 250             | 1.05                 | 0.002     |
|             | 10     | 181                    | 0        | 0          | 209             | 1.10                 | 0.002     |
|             | 11     | 193                    | 0        | 0          | 190             | 1.13                 | 0.002     |
|             | 12     | 208                    | 0        | 0          | -               | -                    | -         |
|             | 13     | 232                    | 0        | 0          | 145             | 1.23                 | 0.002     |
|             | 14     | 262                    | 0        | 0          | 122             | 1.30                 | 0.001     |
|             | 15     | 268                    | 0        | 0          | 118             | 1.32                 | 0.001     |
|             | 16     | 287                    | 0        | 0          | 108             | 1.37                 | 0.001     |
|             | 17     | 308                    | 0        | 0          | 99              | 1.42                 | 0.001     |
|             | 18     | 336                    | 0        | 0          | 89              | 1.49                 | 0.001     |
|             | 19     | 350                    | 0        | 0          | 84              | 1.52                 | 0.001     |
|             | 20     | 373                    | 0        | 0          | 79              | 1.58                 | 0.001     |
|             | 21     | 400                    | 0        | 0          | 73              | 1.64                 | 0.001     |
| torus/cone  | 22     | 17                     | 2.9      | 0          | 691             | 0.33                 | 3.802     |
|             | 23     | 22                     | 1.3      | 0          | 775             | 0.42                 | 4.171     |
|             | 24     | 30                     | 2.7      | 0          | 536             | 0.52                 | 1.970     |
|             | 25     | 38                     | 1.5      | 0          | 563             | 0.58                 | 2.154     |
|             | 26     | 48                     | 1.7      | 0          | 525             | 0.66                 | 1.467     |
|             | 27     | 52                     | 0.9      | 0          | 519             | 0.66                 | 1.579     |
|             | 28     | 62                     | 2.8      | 0          | 361             | 0.76                 | 0.685     |
|             | 29     | 66                     | 3.1      | 0          | 375             | 0.79                 | 0.661     |
|             | 30     | 79                     | 3.6      | 0          | 354             | 0.86                 | 0.543     |
|             | 31     | 87                     | 3.2      | 0          | 320             | 0.89                 | 0.470     |
|             | 32     | 89                     | 0.3      | 0          | 435             | 0.81                 | 0.782     |
|             | 33     | 98                     | 0.2      | 0          | 416             | 0.84                 | 0.689     |
|             | 34     | 106                    | 3.7      | 0          | 289             | 0.96                 | 0.383     |
|             | 35     | 119                    | 1.7      | 0          | 303             | 0.99                 | 0.359     |
|             | 36     | 123                    | 1.8      | 0          | 289             | 1.00                 | 0.341     |
|             | 37     | 133                    | 0.0      | 0          | 345             | 0.95                 | 0.401     |
|             | 38     | 138                    | 1.4      | 0          | 280             | 1.03                 | 0.314     |
|             | 39     | 150                    | 3.8      | 0          | 219             | 1.09                 | 0.276     |
|             | 40     | 155                    | 0.7      | 0          | 279             | 1.04                 | 0.297     |
|             | 41     | 159                    | 0.5      | 0          | 245             | 1.06                 | 0.252     |
|             | 42     | 171                    | 3.0      | 0          | 152             | 1.20                 | 0.253     |
|             | 43     | 180                    | 0.8      | 0          | 198             | 1.12                 | 0.217     |
|             | 44     | 183                    | 1.9      | 0          | 160             | 1.19                 | 0.221     |
|             | 45     | 190                    | 2.5      | 0          | 136             | 1.26                 | 0.230     |
|             | 46     | 205                    | 0.1      | 0          | 186             | 1.14                 | 0.194     |
|             | 47     | 213                    | 2.6      | 0          | 118             | 1.33                 | 0.221     |
|             | 48     | 219                    | 2.9      | 0          | 116             | 1.34                 | 0.228     |
|             | 49     | 224                    | 2.1      | 0          | 121             | 1.32                 | 0.204     |
|             | 50     | 234                    | 1.9      | 0          | 119             | 1.33                 | 0.196     |
|             | 51     | 239                    | 3.5      | 0          | 110             | 1.38                 | 0.208     |
|             | 52     | 247                    | 2.3      | 0          | 105             | 1.40                 | 0.201     |
|             | 53     | 252                    | 0.3      | 0          | 137             | 1.26                 | 0.170     |
|             | 54     | 261                    | 1.0      | 0          | 119             | 1.33                 | 0.175     |

|              |     |     |     |     |     |      |       |
|--------------|-----|-----|-----|-----|-----|------|-------|
|              | 55  | 269 | 3.6 | 0   | 98  | 1.45 | 0.199 |
|              | 56  | 276 | 0.8 | 0   | 114 | 1.35 | 0.169 |
|              | 57  | 288 | 1.1 | 0   | 105 | 1.40 | 0.171 |
|              | 58  | 295 | 1.5 | 0   | 97  | 1.45 | 0.177 |
|              | 59  | 305 | 3.3 | 0   | 86  | 1.54 | 0.196 |
|              | 60  | 307 | 3.8 | 0   | 87  | 1.53 | 0.191 |
|              | 61  | 314 | 0.6 | 0   | 101 | 1.42 | 0.162 |
|              | 62  | 323 | 4.0 | 0   | 72  | 1.67 | 0.176 |
|              | 63  | 337 | 3.1 | 0   | 67  | 1.73 | 0.182 |
|              | 64  | 341 | 2.2 | 0   | 65  | 1.74 | 0.178 |
|              | 65  | 349 | 1.2 | 0   | 73  | 1.64 | 0.160 |
|              | 66  | 357 | 2.0 | 0   | 64  | 1.76 | 0.174 |
|              | 67  | 367 | 3.4 | 0   | 63  | 1.79 | 0.177 |
|              | 68  | 370 | 1.2 | 0   | 80  | 1.59 | 0.167 |
|              | 69  | 377 | 0.4 | 0   | 74  | 1.62 | 0.149 |
| sphere/torus | 70  | 391 | 2.5 | 0   | 56  | 1.90 | 0.183 |
|              | 71  | 394 | 2.4 | 0   | 56  | 1.90 | 0.181 |
|              | 72  | 78  | 0   | 12  | 998 | 0.30 | 0.068 |
|              | 73  | 85  | 0   | 23  | 777 | 0.53 | 0.052 |
|              | 74  | 357 | 0   | 33  | 502 | 1.15 | 0.026 |
|              | 75  | 177 | 0   | 37  | -   | -    | -     |
|              | 76  | 251 | 0   | 43  | 551 | 0.94 | 0.031 |
|              | 77  | 311 | 0   | 50  | 496 | 1.05 | 0.027 |
|              | 78  | 224 | 0   | 58  | 502 | 1.15 | 0.026 |
|              | 79  | 214 | 0   | 68  | 357 | 1.34 | 0.015 |
|              | 80  | 190 | 0   | 80  | 395 | 1.47 | 0.018 |
|              | 81  | 34  | 0   | 85  | 796 | 0.98 | 0.055 |
|              | 82  | 344 | 0   | 95  | 267 | 1.79 | 0.015 |
|              | 83  | 108 | 0   | 98  | 472 | 1.54 | 0.023 |
|              | 84  | 373 | 0   | 110 | 331 | 1.81 | 0.020 |
|              | 85  | 69  | 0   | 112 | 581 | 1.51 | 0.031 |
|              | 86  | 164 | 0   | 122 | 281 | 1.98 | 0.015 |
|              | 87  | 368 | 0   | 132 | 135 | 2.57 | 0.012 |
|              | 88  | 323 | 0   | 137 | 137 | 2.59 | 0.012 |
|              | 89  | 145 | 0   | 144 | 259 | 2.17 | 0.016 |
|              | 90  | 253 | 0   | 153 | 138 | 2.72 | 0.013 |
|              | 91  | 271 | 0   | 166 | 121 | 2.98 | 0.013 |
|              | 92  | 346 | 0   | 170 | 62  | 3.97 | 0.014 |
|              | 93  | 151 | 0   | 177 | 195 | 2.58 | 0.015 |
|              | 94  | 301 | 0   | 183 | 60  | 4.15 | 0.014 |
|              | 95  | 292 | 0   | 191 | 58  | 4.32 | 0.014 |
|              | 96  | 122 | 0   | 205 | -   | -    | -     |
|              | 97  | 240 | 0   | 209 | 59  | 4.44 | 0.015 |
|              | 98  | 136 | 0   | 218 | 97  | 3.48 | 0.015 |
|              | 99  | 320 | 0   | 228 | 45  | 5.45 | 0.016 |
|              | 100 | 211 | 0   | 234 | 57  | 4.76 | 0.016 |
|              | 101 | 384 | 0   | 237 | 40  | 6.00 | 0.017 |
|              | 102 | 396 | 0   | 249 | 38  | 6.37 | 0.017 |
|              | 103 | 24  | 0   | 253 | 905 | 1.56 | 0.062 |
|              | 104 | 45  | 0   | 264 | 555 | 2.17 | 0.036 |
|              | 105 | 204 | 0   | 271 | 50  | 5.49 | 0.017 |
|              | 106 | 116 | 0   | 276 | 145 | 3.43 | 0.017 |
|              | 107 | 58  | 0   | 290 | 400 | 2.55 | 0.028 |
|              | 108 | 230 | 0   | 294 | 42  | 6.31 | 0.018 |
|              | 109 | 51  | 0   | 306 | 438 | 2.51 | 0.030 |
|              | 110 | 173 | 0   | 310 | 50  | 5.82 | 0.018 |
|              | 111 | 387 | 0   | 318 | 31  | 8.08 | 0.020 |
|              | 112 | 132 | 0   | 326 | 62  | 5.23 | 0.018 |
|              | 113 | 280 | 0   | 332 | 34  | 7.67 | 0.020 |
|              | 114 | 265 | 0   | 339 | 35  | 7.68 | 0.020 |
|              | 115 | 102 | 0   | 353 | 78  | 4.75 | 0.019 |

|             |     |     |     |     |      |      |       |
|-------------|-----|-----|-----|-----|------|------|-------|
|             | 116 | 284 | 0   | 359 | 32   | 8.29 | 0.021 |
|             | 117 | 17  | 0   | 363 | -    | -    | -     |
|             | 118 | 182 | 0   | 375 | 41   | 7.24 | 0.021 |
|             | 119 | 32  | 0   | 384 | 619  | 2.33 | 0.044 |
|             | 120 | 337 | 0   | 389 | 29   | 9.37 | 0.023 |
|             | 121 | 92  | 0   | 395 | 80   | 4.92 | 0.020 |
| torus/torus | 122 | 142 | 3.9 | 12  | 900  | 0.30 | 0.065 |
|             | 123 | 287 | 3.3 | 14  | -    | -    | -     |
|             | 124 | 348 | 0.2 | 19  | -    | -    | -     |
|             | 125 | 85  | 0.9 | 25  | 751  | 0.57 | 0.050 |
|             | 126 | 391 | 1.4 | 26  | -    | -    | -     |
|             | 127 | 105 | 0.4 | 33  | -    | -    | -     |
|             | 128 | 354 | 1.9 | 34  | -    | -    | -     |
|             | 129 | 272 | 3.9 | 41  | 548  | 0.91 | 0.030 |
|             | 130 | 92  | 1.5 | 43  | 662  | 0.88 | 0.038 |
|             | 131 | 45  | 4.0 | 47  | 740  | 0.81 | 0.051 |
|             | 132 | 178 | 3.9 | 53  | 503  | 1.09 | 0.024 |
|             | 133 | 221 | 1.7 | 53  | 492  | 1.10 | 0.024 |
|             | 134 | 31  | 1.7 | 58  | 835  | 0.78 | 0.060 |
|             | 135 | 167 | 1.8 | 61  | 489  | 1.20 | 0.023 |
|             | 136 | 28  | 1.0 | 66  | 870  | 0.79 | 0.063 |
|             | 137 | 192 | 2.2 | 72  | 414  | 1.37 | 0.019 |
|             | 138 | 173 | 2.0 | 76  | 417  | 1.41 | 0.019 |
|             | 139 | 115 | 1.6 | 79  | 498  | 1.37 | 0.024 |
|             | 140 | 228 | 1.3 | 81  | 350  | 1.53 | 0.016 |
|             | 141 | 241 | 0.3 | 87  | 320  | 1.63 | 0.015 |
|             | 142 | 360 | 3.2 | 91  | -    | -    | -     |
|             | 143 | 281 | 2.0 | 94  | 262  | 1.78 | 0.014 |
|             | 144 | 220 | 1.3 | 96  | 295  | 1.74 | 0.015 |
|             | 145 | 17  | 2.8 | 100 | 1025 | 0.87 | 0.074 |
|             | 146 | 339 | 2.2 | 107 | -    | -    | -     |
|             | 147 | 25  | 0.4 | 111 | 892  | 1.00 | 0.063 |
|             | 148 | 163 | 1.1 | 114 | 298  | 1.89 | 0.016 |
|             | 149 | 195 | 2.4 | 119 | 239  | 2.04 | 0.014 |
|             | 150 | 63  | 0.9 | 121 | 584  | 1.56 | 0.032 |
|             | 151 | 313 | 3.1 | 125 | 150  | 2.41 | 0.012 |
|             | 152 | 60  | 2.4 | 129 | 564  | 1.63 | 0.031 |
|             | 153 | 127 | 1.0 | 135 | 308  | 2.02 | 0.017 |
|             | 154 | 269 | 3.5 | 138 | 142  | 2.57 | 0.012 |
|             | 155 | 365 | 1.2 | 140 | 124  | 2.73 | 0.012 |
|             | 156 | 72  | 3.7 | 146 | 440  | 1.88 | 0.025 |
|             | 157 | 44  | 3.7 | 150 | 255  | 2.22 | 0.038 |
|             | 158 | 137 | 0.8 | 150 | 616  | 1.67 | 0.016 |
|             | 159 | 298 | 2.5 | 154 | 120  | 2.89 | 0.013 |
|             | 160 | 101 | 1.2 | 162 | 321  | 2.16 | 0.019 |
|             | 161 | 212 | 1.5 | 164 | 139  | 2.80 | 0.013 |
|             | 162 | 380 | 2.3 | 167 | 59   | 4.06 | 0.014 |
|             | 163 | 151 | 0.5 | 171 | 200  | 2.53 | 0.015 |
|             | 164 | 400 | 2.1 | 176 | 54   | 4.38 | 0.014 |
|             | 165 | 382 | 3.8 | 179 | 53   | 4.46 | 0.014 |
|             | 166 | 183 | 1.1 | 183 | 138  | 2.94 | 0.014 |
|             | 167 | 334 | 2.5 | 187 | 54   | 4.49 | 0.015 |
|             | 168 | 13  | 0.2 | 192 | -    | -    | -     |
|             | 169 | 324 | 3.1 | 194 | 52   | 4.66 | 0.015 |
|             | 170 | 80  | 0.6 | 198 | 356  | 2.27 | 0.022 |
|             | 171 | 206 | 0.8 | 202 | 68   | 4.03 | 0.015 |
|             | 172 | 187 | 3.2 | 206 | 69   | 4.07 | 0.015 |
|             | 173 | 67  | 0.6 | 209 | 419  | 2.21 | 0.026 |
|             | 174 | 317 | 0.4 | 213 | 49   | 5.05 | 0.015 |
|             | 175 | 121 | 0.1 | 220 | 112  | 3.28 | 0.015 |
|             | 176 | 385 | 0.7 | 224 | 42   | 5.67 | 0.016 |

|                      |     |     |     |      |     |      |       |
|----------------------|-----|-----|-----|------|-----|------|-------|
|                      | 177 | 326 | 2.0 | 228  | 44  | 5.56 | 0.016 |
|                      | 178 | 95  | 2.7 | 229  | 222 | 2.78 | 0.019 |
|                      | 179 | 150 | 2.1 | 235  | 74  | 4.15 | 0.016 |
|                      | 180 | 49  | 1.8 | 238  | 504 | 2.19 | 0.033 |
|                      | 181 | 337 | 2.7 | 240  | 41  | 5.97 | 0.017 |
|                      | 182 | 131 | 0.3 | 245  | 141 | 3.30 | 0.016 |
|                      | 183 | 374 | 1.3 | 248  | 38  | 6.30 | 0.017 |
|                      | 184 | 204 | 3.3 | 253  | 51  | 5.32 | 0.017 |
|                      | 185 | 96  | 0.9 | 259  | 209 | 2.98 | 0.019 |
|                      | 186 | 77  | 0.7 | 261  | 285 | 2.72 | 0.021 |
|                      | 187 | 350 | 2.6 | 265  | 37  | 6.68 | 0.018 |
|                      | 188 | 19  | 2.7 | 270  | 937 | 1.68 | 0.066 |
|                      | 189 | 306 | 2.6 | 273  | 38  | 6.63 | 0.018 |
|                      | 190 | 263 | 2.8 | 276  | 40  | 6.39 | 0.018 |
|                      | 191 | 247 | 0.4 | 282  | 42  | 6.25 | 0.018 |
|                      | 192 | 179 | 3.3 | 286  | 49  | 5.71 | 0.018 |
|                      | 193 | 197 | 1.1 | 288  | 47  | 5.84 | 0.018 |
|                      | 194 | 146 | 3.6 | 294  | 56  | 5.33 | 0.018 |
|                      | 195 | 248 | 2.1 | 296  | 39  | 6.68 | 0.019 |
|                      | 196 | 233 | 3.0 | 299  | 40  | 6.65 | 0.019 |
|                      | 197 | 276 | 1.5 | 303  | 37  | 7.06 | 0.019 |
|                      | 198 | 131 | 3.8 | 308  | 59  | 5.30 | 0.019 |
|                      | 199 | 365 | 1.8 | 313  | 32  | 7.93 | 0.020 |
|                      | 200 | 215 | 1.7 | 317  | 41  | 6.74 | 0.019 |
|                      | 201 | 255 | 3.6 | 320  | 36  | 7.39 | 0.020 |
|                      | 202 | 307 | 0.7 | 324  | 33  | 7.75 | 0.020 |
|                      | 203 | 73  | 0.0 | 327  | 155 | 3.41 | 0.019 |
|                      | 204 | 394 | 2.3 | 332  | 30  | 8.55 | 0.021 |
|                      | 205 | 109 | 0.1 | 335  | 75  | 4.73 | 0.018 |
|                      | 206 | 160 | 0.6 | 339  | 48  | 6.18 | 0.019 |
|                      | 207 | 118 | 3.0 | 342  | 61  | 5.46 | 0.020 |
|                      | 208 | 34  | 3.4 | 347  | 518 | 2.52 | 0.041 |
|                      | 209 | 37  | 2.5 | 350  | 510 | 2.55 | 0.039 |
|                      | 210 | 237 | 2.8 | 355  | 35  | 7.90 | 0.021 |
|                      | 211 | 291 | 2.9 | 361  | 31  | 8.58 | 0.022 |
|                      | 212 | 56  | 3.6 | 363  | 267 | 3.22 | 0.026 |
|                      | 213 | 232 | 3.1 | 367  | 34  | 8.11 | 0.022 |
|                      | 214 | 319 | 1.6 | 372  | 30  | 8.96 | 0.022 |
|                      | 215 | 290 | 0.1 | 375  | 31  | 8.69 | 0.022 |
|                      | 216 | 300 | 1.4 | 379  | 30  | 8.95 | 0.022 |
|                      | 217 | 342 | 3.4 | 382  | 28  | 9.43 | 0.023 |
|                      | 218 | 371 | 3.6 | 388  | 27  | 9.75 | 0.023 |
|                      | 219 | 157 | 2.9 | 392  | 42  | 7.32 | 0.022 |
|                      | 220 | 258 | 3.5 | 394  | 31  | 8.99 | 0.023 |
|                      | 221 | 265 | 2.3 | 400  | 31  | 9.11 | 0.023 |
| sphere/torus concave | 222 | 37  | 0   | -53  | 228 | 1.62 | 0.008 |
|                      | 223 | 18  | 0   | -59  | 749 | 0.80 | 0.052 |
|                      | 224 | 50  | 0   | -63  | 42  | 3.47 | 0.007 |
|                      | 225 | 57  | 0   | -79  | 38  | 3.90 | 0.010 |
|                      | 226 | 31  | 0   | -83  | 818 | 0.92 | 0.058 |
|                      | 227 | 40  | 0   | -98  | 755 | 1.15 | 0.048 |
|                      | 228 | 25  | 0   | -101 | 896 | 0.93 | 0.065 |
|                      | 229 | 67  | 0   | -105 | 604 | 1.45 | 0.032 |
|                      | 230 | 106 | 0   | -106 | 456 | 1.62 | 0.022 |
|                      | 231 | 61  | 0   | -115 | 617 | 1.48 | 0.034 |
|                      | 232 | 52  | 0   | -127 | 655 | 1.49 | 0.038 |
|                      | 233 | 80  | 0   | -144 | 466 | 1.83 | 0.025 |
|                      | 234 | 43  | 0   | -146 | 704 | 1.51 | 0.043 |
|                      | 235 | 22  | 0   | -162 | 957 | 1.14 | 0.067 |
|                      | 236 | 118 | 0   | -174 | 260 | 2.35 | 0.017 |
|                      | 237 | 42  | 0   | -178 | 685 | 1.68 | 0.043 |

|                     |     |     |     |      |      |      |       |
|---------------------|-----|-----|-----|------|------|------|-------|
|                     | 238 | 70  | 0   | -180 | 456  | 2.02 | 0.026 |
|                     | 239 | 102 | 0   | -187 | 286  | 2.36 | 0.018 |
|                     | 240 | 138 | 0   | -192 | 195  | 2.68 | 0.016 |
|                     | 241 | 95  | 0   | -196 | 298  | 2.38 | 0.019 |
|                     | 242 | 185 | 0   | -204 | 76   | 3.83 | 0.014 |
|                     | 243 | 156 | 0   | -212 | 140  | 3.11 | 0.014 |
|                     | 244 | 55  | 0   | -222 | 509  | 2.11 | 0.031 |
|                     | 245 | 87  | 0   | -223 | 293  | 2.52 | 0.020 |
|                     | 246 | 71  | 0   | -226 | 379  | 2.35 | 0.024 |
|                     | 247 | 108 | 0   | -229 | 213  | 2.80 | 0.017 |
|                     | 248 | 121 | 0   | -237 | 101  | 3.53 | 0.015 |
|                     | 249 | 38  | 0   | -243 | 674  | 1.92 | 0.044 |
|                     | 250 | 100 | 0   | -246 | 218  | 2.87 | 0.018 |
|                     | 251 | 89  | 0   | -250 | 251  | 2.76 | 0.019 |
|                     | 252 | 153 | 0   | -255 | 69   | 4.41 | 0.016 |
|                     | 253 | 224 | 0   | -256 | 49   | 5.39 | 0.017 |
|                     | 254 | 146 | 0   | -258 | 72   | 4.35 | 0.016 |
|                     | 255 | 192 | 0   | -263 | 54   | 5.16 | 0.017 |
|                     | 256 | 143 | 0   | -264 | 71   | 4.40 | 0.016 |
|                     | 257 | 260 | 0   | -273 | 42   | 6.14 | 0.017 |
|                     | 258 | 76  | 0   | -282 | 279  | 2.82 | 0.022 |
|                     | 259 | 141 | 0   | -283 | 67   | 4.70 | 0.017 |
|                     | 260 | 169 | 0   | -286 | 55   | 5.28 | 0.017 |
|                     | 261 | 133 | 0   | -290 | 70   | 4.65 | 0.017 |
|                     | 262 | 161 | 0   | -294 | 56   | 5.29 | 0.017 |
|                     | 263 | 207 | 0   | -297 | 45   | 6.08 | 0.018 |
|                     | 264 | 14  | 0   | -298 | -    | -    | -     |
|                     | 265 | 128 | 0   | -299 | 70   | 4.68 | 0.017 |
|                     | 266 | 118 | 0   | -303 | 77   | 4.49 | 0.017 |
|                     | 267 | 135 | 0   | -309 | 64   | 5.01 | 0.018 |
|                     | 268 | 205 | 0   | -309 | 44   | 6.31 | 0.018 |
|                     | 269 | 11  | 0   | -314 | -    | -    | -     |
|                     | 270 | 211 | 0   | -314 | -    | -    | -     |
|                     | 271 | 91  | 0   | -320 | 189  | 3.36 | 0.020 |
|                     | 272 | 175 | 0   | -324 | 47   | 6.13 | 0.019 |
|                     | 273 | 15  | 0   | -337 | 1182 | 1.31 | 0.084 |
|                     | 274 | 269 | 0   | -344 | 34   | 7.82 | 0.020 |
|                     | 275 | 324 | 0   | -353 | 40   | 7.13 | 0.020 |
|                     | 276 | 200 | 0   | -353 | 31   | 8.50 | 0.021 |
|                     | 277 | 258 | 0   | -355 | 34   | 7.94 | 0.021 |
|                     | 278 | 77  | 0   | -362 | 121  | 3.91 | 0.019 |
|                     | 279 | 249 | 0   | -363 | 34   | 8.01 | 0.021 |
|                     | 280 | 225 | 0   | -368 | 36   | 7.80 | 0.021 |
|                     | 281 | 357 | 0   | -372 | 29   | 9.14 | 0.022 |
|                     | 282 | 219 | 0   | -373 | 36   | 7.82 | 0.021 |
|                     | 283 | 287 | 0   | -377 | 31   | 8.70 | 0.022 |
|                     | 284 | 79  | 0   | -382 | 193  | 3.59 | 0.022 |
|                     | 285 | 289 | 0   | -384 | 31   | 8.86 | 0.022 |
|                     | 286 | 99  | 0   | -387 | 74   | 5.10 | 0.020 |
|                     | 287 | 304 | 0   | -391 | 30   | 9.15 | 0.022 |
|                     | 288 | 59  | 0   | -393 | 298  | 3.17 | 0.026 |
|                     | 289 | 338 | 0   | -395 | 28   | 9.50 | 0.023 |
| torus/torus concave | 290 | 30  | 0.4 | -47  | 422  | 1.32 | 0.013 |
|                     | 291 | 36  | 1.3 | -55  | 264  | 1.58 | 0.009 |
|                     | 292 | 54  | 0.3 | -66  | -    | -    | -     |
|                     | 293 | 47  | 2.0 | -71  | -    | -    | -     |
|                     | 294 | 41  | 2.3 | -75  | 214  | 1.79 | 0.011 |
|                     | 295 | 49  | 1.9 | -85  | 114  | 2.29 | 0.009 |
|                     | 296 | 10  | 2.2 | -93  | -    | -    | -     |
|                     | 297 | 44  | 1.1 | -105 | 718  | 1.28 | 0.044 |
|                     | 298 | 69  | 0.7 | -112 | 573  | 1.53 | 0.030 |

|  |     |     |     |      |     |      |       |
|--|-----|-----|-----|------|-----|------|-------|
|  | 299 | 29  | 2.4 | -124 | 824 | 1.25 | 0.055 |
|  | 300 | 39  | 2.3 | -130 | 719 | 1.44 | 0.045 |
|  | 301 | 82  | 2.5 | -151 | 403 | 1.96 | 0.022 |
|  | 302 | 33  | 2.8 | -163 | 741 | 1.57 | 0.048 |
|  | 303 | 135 | 2.6 | -165 | 136 | 2.71 | 0.014 |
|  | 304 | 172 | 2.4 | -172 | 97  | 3.16 | 0.014 |
|  | 305 | 22  | 1.2 | -173 | 945 | 1.27 | 0.065 |
|  | 306 | 66  | 2.6 | -175 | 442 | 2.03 | 0.026 |
|  | 307 | 42  | 0.6 | -177 | 675 | 1.70 | 0.042 |
|  | 308 | 127 | 0.1 | -180 | 141 | 2.75 | 0.014 |
|  | 309 | 171 | 1.3 | -186 | 90  | 3.39 | 0.014 |
|  | 310 | 118 | 1.8 | -190 | 220 | 2.57 | 0.017 |
|  | 311 | 117 | 0.9 | -192 | 227 | 2.56 | 0.017 |
|  | 312 | 73  | 0.6 | -198 | 397 | 2.20 | 0.024 |
|  | 313 | 108 | 1.4 | -202 | 231 | 2.60 | 0.017 |
|  | 314 | 55  | 1.9 | -204 | 492 | 2.08 | 0.030 |
|  | 315 | 58  | 0.4 | -209 | 492 | 2.09 | 0.030 |
|  | 316 | 139 | 2.1 | -212 | 146 | 3.07 | 0.015 |
|  | 317 | 88  | 0.7 | -214 | 291 | 2.49 | 0.020 |
|  | 318 | 105 | 2.7 | -215 | 212 | 2.75 | 0.018 |
|  | 319 | 138 | 0.2 | -218 | 152 | 3.05 | 0.015 |
|  | 320 | 187 | 2.2 | -219 | 65  | 4.30 | 0.015 |
|  | 321 | 15  | 2.1 | -226 | -   | -    | -     |
|  | 322 | 174 | 1.2 | -227 | 68  | 4.25 | 0.015 |
|  | 323 | 212 | 1.6 | -235 | 55  | 4.89 | 0.016 |
|  | 324 | 202 | 2.5 | -238 | 55  | 4.90 | 0.016 |
|  | 325 | 192 | 2.2 | -240 | 57  | 4.82 | 0.016 |
|  | 326 | 232 | 1.9 | -246 | 49  | 5.35 | 0.016 |
|  | 327 | 83  | 2.8 | -254 | 236 | 2.86 | 0.020 |
|  | 328 | 235 | 2.7 | -257 | 46  | 5.69 | 0.017 |
|  | 329 | 103 | 0.5 | -258 | 196 | 3.03 | 0.018 |
|  | 330 | 46  | 2.1 | -261 | 501 | 2.28 | 0.034 |
|  | 331 | 179 | 1.5 | -263 | 56  | 5.09 | 0.017 |
|  | 332 | 241 | 1.4 | -264 | 45  | 5.83 | 0.017 |
|  | 333 | 182 | 0.2 | -268 | 55  | 5.14 | 0.017 |
|  | 334 | 72  | 1.0 | -271 | 298 | 2.73 | 0.022 |
|  | 335 | 79  | 0.7 | -273 | 262 | 2.84 | 0.021 |
|  | 336 | 149 | 2.7 | -275 | 61  | 4.94 | 0.017 |
|  | 337 | 97  | 1.0 | -281 | 189 | 3.18 | 0.019 |
|  | 338 | 197 | 0.1 | -282 | 49  | 5.64 | 0.017 |
|  | 339 | 256 | 1.2 | -283 | 41  | 6.40 | 0.018 |
|  | 340 | 125 | 0.2 | -286 | 76  | 4.42 | 0.017 |
|  | 341 | 112 | 2.9 | -290 | 77  | 4.43 | 0.018 |
|  | 342 | 24  | 0.4 | -291 | 881 | 1.73 | 0.061 |
|  | 343 | 267 | 1.6 | -294 | 38  | 6.78 | 0.019 |
|  | 344 | 240 | 1.7 | -296 | 40  | 6.57 | 0.019 |
|  | 345 | 198 | 1.7 | -297 | 45  | 6.09 | 0.018 |
|  | 346 | 221 | 1.3 | -300 | 42  | 6.42 | 0.018 |
|  | 347 | 51  | 0.8 | -301 | 438 | 2.52 | 0.031 |
|  | 348 | 63  | 0.8 | -304 | 327 | 2.78 | 0.025 |
|  | 349 | 260 | 1.7 | -305 | 38  | 6.98 | 0.019 |
|  | 350 | 267 | 1.5 | -307 | 37  | 7.08 | 0.019 |
|  | 351 | 68  | 1.9 | -309 | 268 | 2.99 | 0.023 |
|  | 352 | 244 | 2.9 | -313 | 38  | 7.08 | 0.019 |
|  | 353 | 131 | 3.0 | -317 | 59  | 5.37 | 0.019 |
|  | 354 | 13  | 2.0 | -319 | -   | -    | -     |
|  | 355 | 143 | 2.6 | -322 | 54  | 5.69 | 0.019 |
|  | 356 | 185 | 1.3 | -324 | 52  | 5.79 | 0.018 |
|  | 357 | 158 | 0.0 | -324 | 44  | 6.41 | 0.019 |
|  | 358 | 94  | 1.5 | -327 | 90  | 4.30 | 0.018 |
|  | 359 | 128 | 1.9 | -328 | 60  | 5.36 | 0.019 |

|  |     |     |     |      |     |      |       |
|--|-----|-----|-----|------|-----|------|-------|
|  | 360 | 188 | 2.5 | -330 | 42  | 6.69 | 0.020 |
|  | 361 | 285 | 0.8 | -334 | 34  | 7.80 | 0.020 |
|  | 362 | 275 | 1.8 | -337 | 34  | 7.84 | 0.020 |
|  | 363 | 90  | 2.0 | -340 | 147 | 3.76 | 0.019 |
|  | 364 | 218 | 0.5 | -343 | 38  | 7.23 | 0.020 |
|  | 365 | 161 | 2.4 | -344 | 46  | 6.46 | 0.020 |
|  | 366 | 34  | 2.6 | -346 | 544 | 2.46 | 0.041 |
|  | 367 | 107 | 2.2 | -348 | 69  | 5.11 | 0.019 |
|  | 368 | 96  | 2.0 | -350 | 79  | 4.75 | 0.019 |
|  | 369 | 76  | 0.4 | -353 | 196 | 3.42 | 0.020 |
|  | 370 | 281 | 3.0 | -354 | 32  | 8.34 | 0.021 |
|  | 371 | 115 | 1.1 | -355 | 64  | 5.34 | 0.019 |
|  | 372 | 60  | 1.8 | -358 | 259 | 3.18 | 0.024 |
|  | 373 | 26  | 2.8 | -361 | 675 | 2.27 | 0.051 |
|  | 374 | 154 | 2.9 | -362 | 45  | 6.70 | 0.021 |
|  | 375 | 264 | 1.2 | -366 | 33  | 8.32 | 0.021 |
|  | 376 | 365 | 0.9 | -371 | 29  | 9.12 | 0.022 |
|  | 377 | 346 | 1.5 | -371 | 29  | 9.21 | 0.022 |
|  | 378 | 338 | 0.2 | -374 | 29  | 9.07 | 0.022 |
|  | 379 | 253 | 1.0 | -375 | 33  | 8.37 | 0.022 |
|  | 380 | 21  | 0.2 | -377 | 928 | 1.85 | 0.065 |
|  | 381 | 19  | 0.6 | -381 | 978 | 1.80 | 0.069 |
|  | 382 | 352 | 1.7 | -383 | 28  | 9.43 | 0.023 |
|  | 383 | 220 | 1.8 | -386 | 34  | 8.24 | 0.022 |
|  | 384 | 305 | 2.9 | -387 | 29  | 9.24 | 0.023 |
|  | 385 | 169 | 0.9 | -390 | 41  | 7.33 | 0.021 |
|  | 386 | 17  | 2.2 | -392 | 963 | 1.92 | 0.070 |
|  | 387 | 227 | 0.3 | -392 | 34  | 8.33 | 0.022 |
|  | 388 | 159 | 2.8 | -394 | 41  | 7.39 | 0.022 |
|  | 389 | 396 | 0.1 | -397 | 27  | 9.92 | 0.023 |
|  | 390 | 307 | 1.3 | -400 | 29  | 9.44 | 0.023 |

\* Parameters results were rounded. For values marked with "-", the solution was not converged. All results were rounded.
